# Supplementary material for: Synthesis, antimicrobial, anti-cancer and molecular docking of two novel hitherto unreported thiophenes
Source: Royal Society of Chemistry journal article supplement (doi:10.1039/c6ra09883e), 2016-01-01
Supplement: c6ra09883e1.pdf [file c6ra09883e1.pdf]

## SUPPORTING INFORMATION

### Synthesis, Antimicrobial, Anti-Cancer and Molecular Docking of Two Novel Hitherto Unreported Thiophenes

Yahia N. Mabkhot, Nabila AbdelshafyKheder, Assem Barakat, Muhammad I.  
Choudhary, SammerYousuf and Wolfgang Frey

Table of contents

Part 1: Copies of NMR Spectra

Part 2: Copies of the dose response curve generated for compounds **3a,b**

Part 3: Molecular Docking

Part 4: X-ray data for the synthesized compound **3a** and **3b**

# Part 1: Copies of NMR Spectra

Figure S1:  $^1\text{H}$  NMR of thiophene **3a**

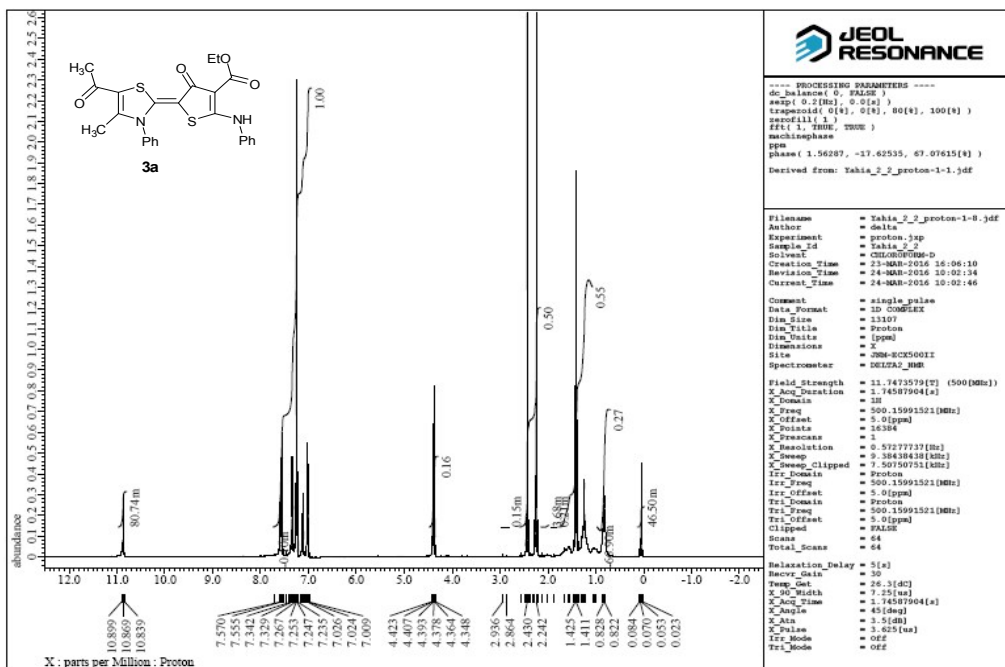

Figure S2:  $^{13}\text{C}$  NMR of thiophene **3a**

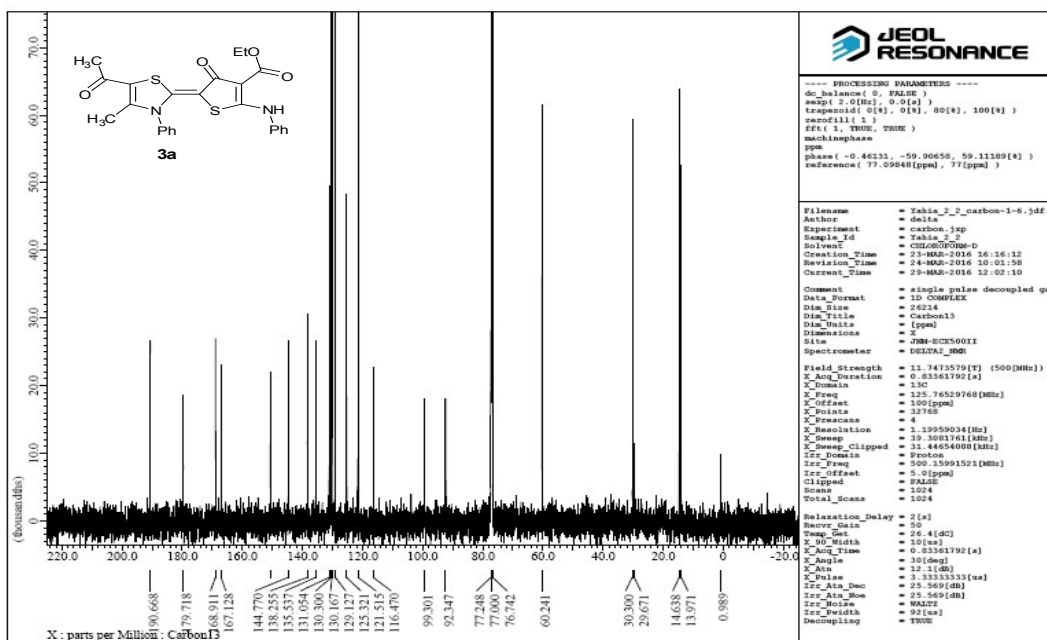

Figure S3: NOESY of 3a

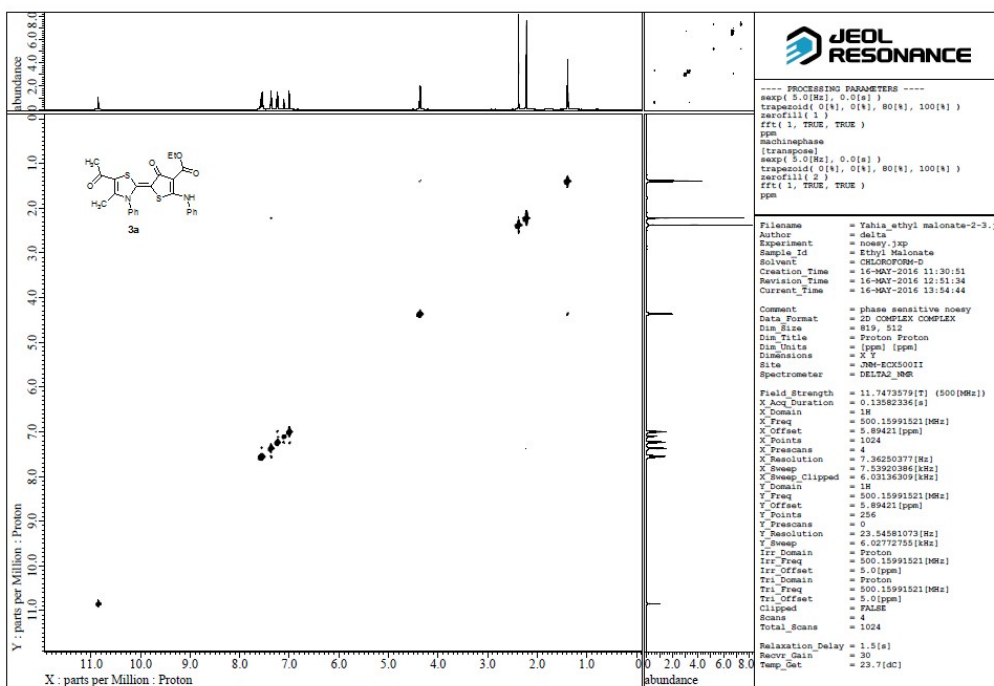

Figure S4: <sup>1</sup>H NMR of thiophene 3b

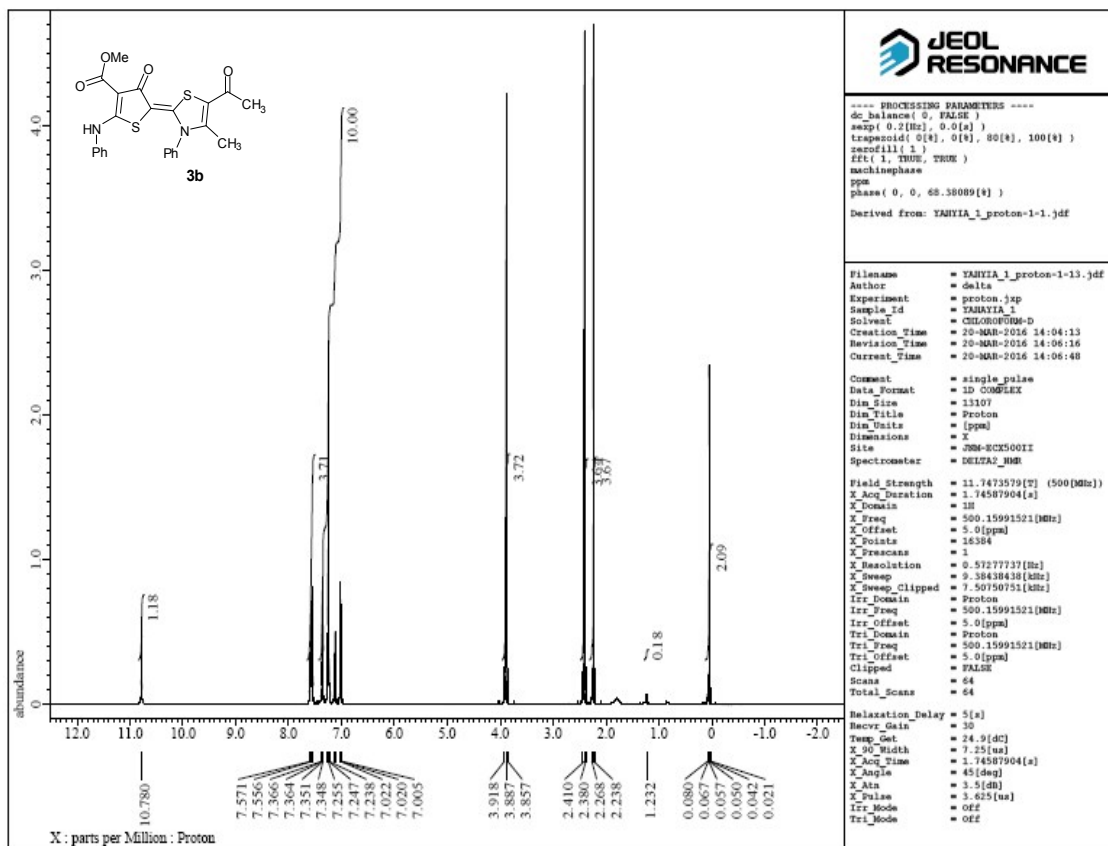

Figure S5: <sup>13</sup>C NMR of thiophene **3b**

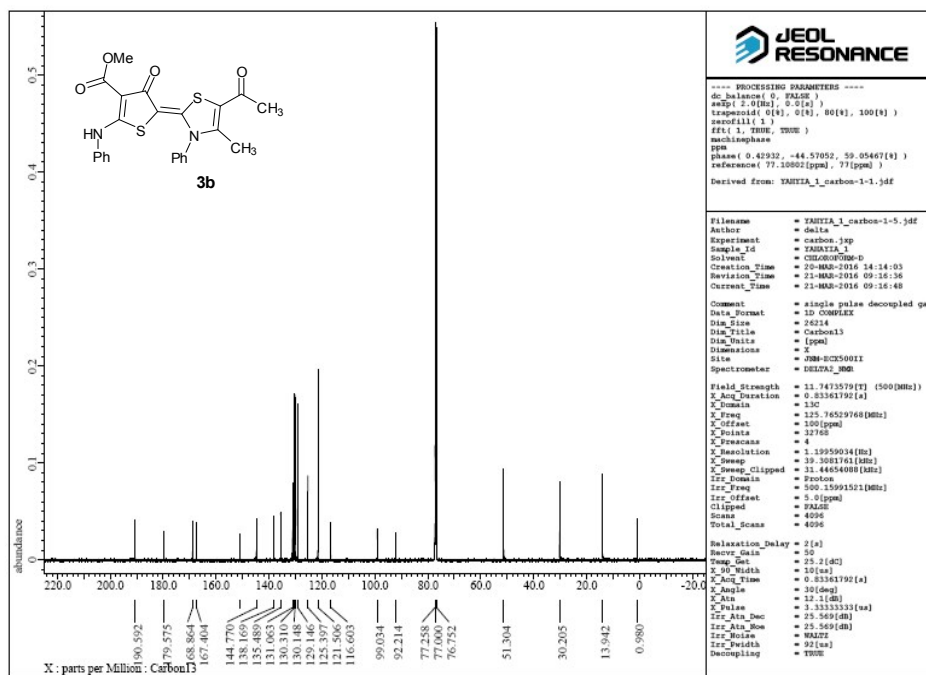

Figure S6: NOESY of **3b**

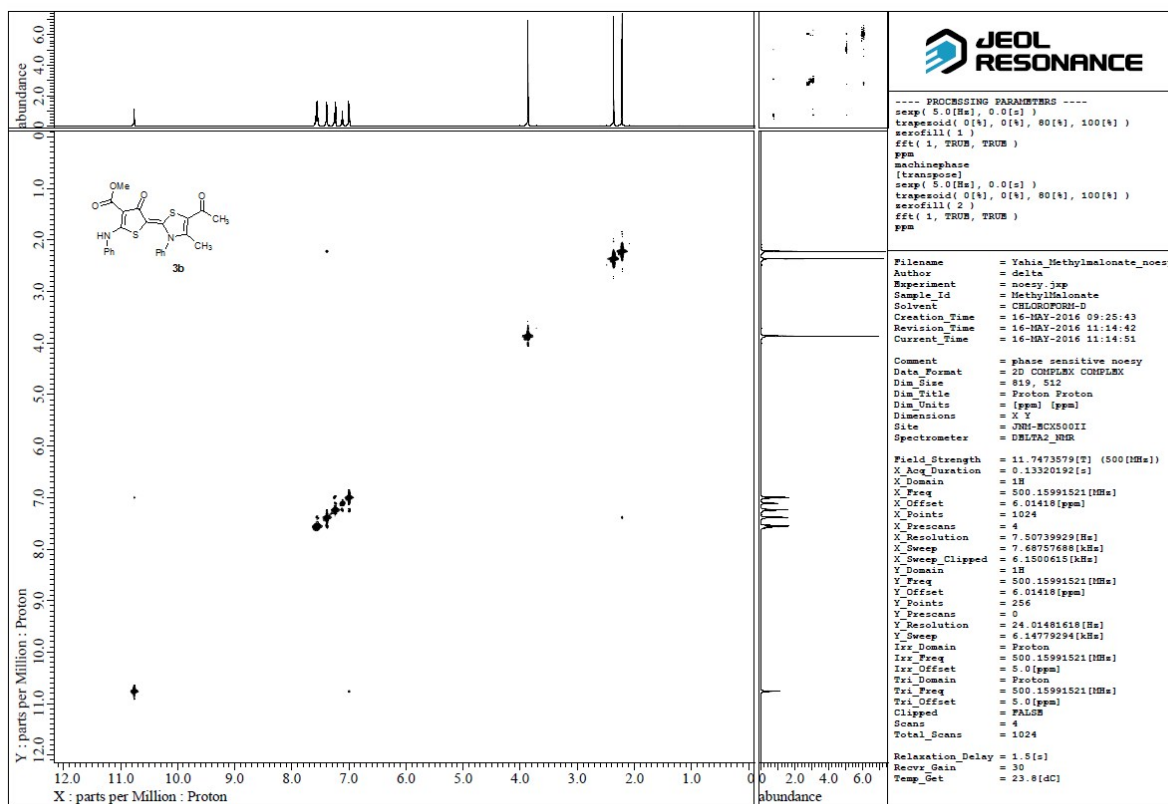

## Part 2: Copies of the dose response curve generated for compounds

Figure S7: Dose response curve of thiophene 3a

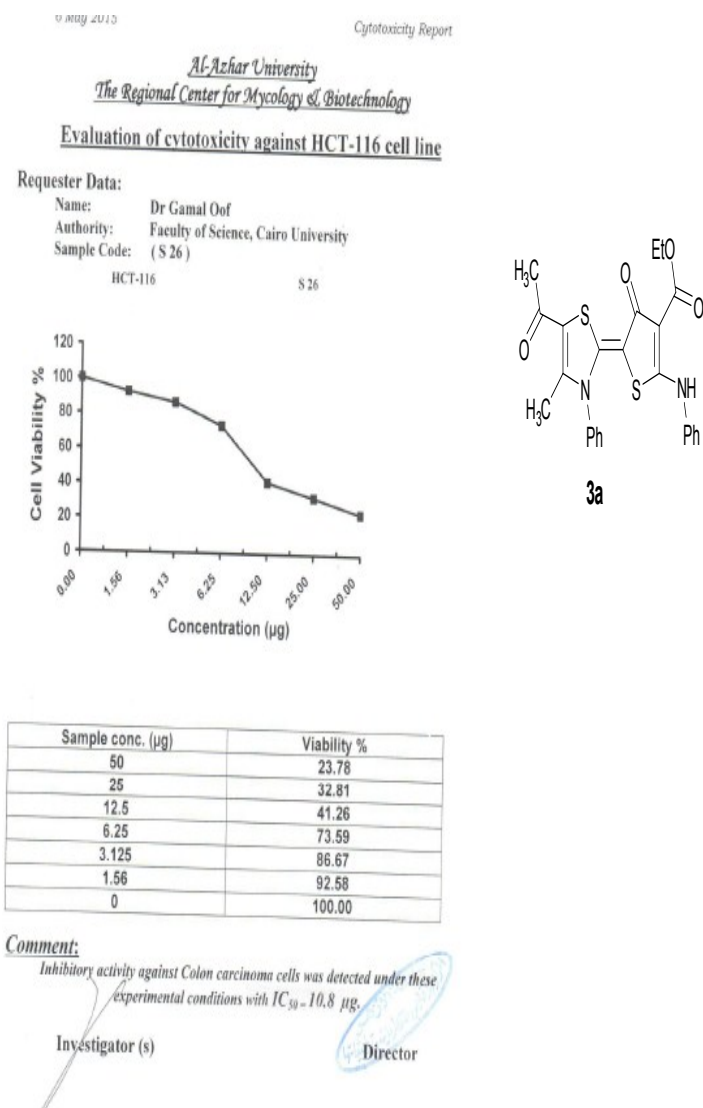

Figure S8: Dose response curve of thiophene 3b

6 May 2015

Cytotoxicity Report

*Al-Azhar University*  
*The Regional Center for Mycology & Biotechnology*

**Evaluation of cytotoxicity against HCT-116 cell line**

**Requester Data:**

Name: Dr Gamal Oof  
Authority: Faculty of Science, Cairo University  
Sample Code: ( S 25 )

HCT-116

S 25

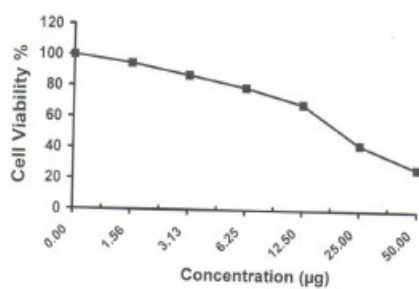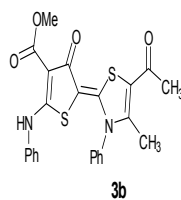

| Sample conc. (µg) | Viability % |
|-------------------|-------------|
| 50                | 27.68       |
| 25                | 42.83       |
| 12.5              | 68.72       |
| 6.25              | 79.13       |
| 3.125             | 87.04       |
| 1.56              | 94.65       |
| 0                 | 100.00      |

**Comment:**

Inhibitory activity against Colon carcinoma cells was detected under these experimental conditions with  $IC_{50} = 21.5 \mu g$ .

Investigator (s)

Director

### Part 3: Molecular Docking

#### The binding modes of thiophenes **3a,b** with *E. coli* succinate dehydrogenase protein (PDB:1NEK).

A docking study was performed to fit the synthesized thiophenes **3a,b** into the active center of the *E. coli* succinate dehydrogenase in order to study the interaction between binding model and bacterial activity, all docking runs using MOE 2008.10. The binding model of compound **3a** with *E. Coli* Succinate Dehydrogenase protein is presented in Figure S9(A,B). As shown in figure S9(A), there is hydrogen bond interaction between the oxygen atom of the carbonyl group of the acetyl moiety of thiophene **3a**, as it acts as a hydrogen bond acceptor with the side chain of Glu388 (3 Å) with a strength of 12%. This bond enhanced the combination activity of compound **3a**.

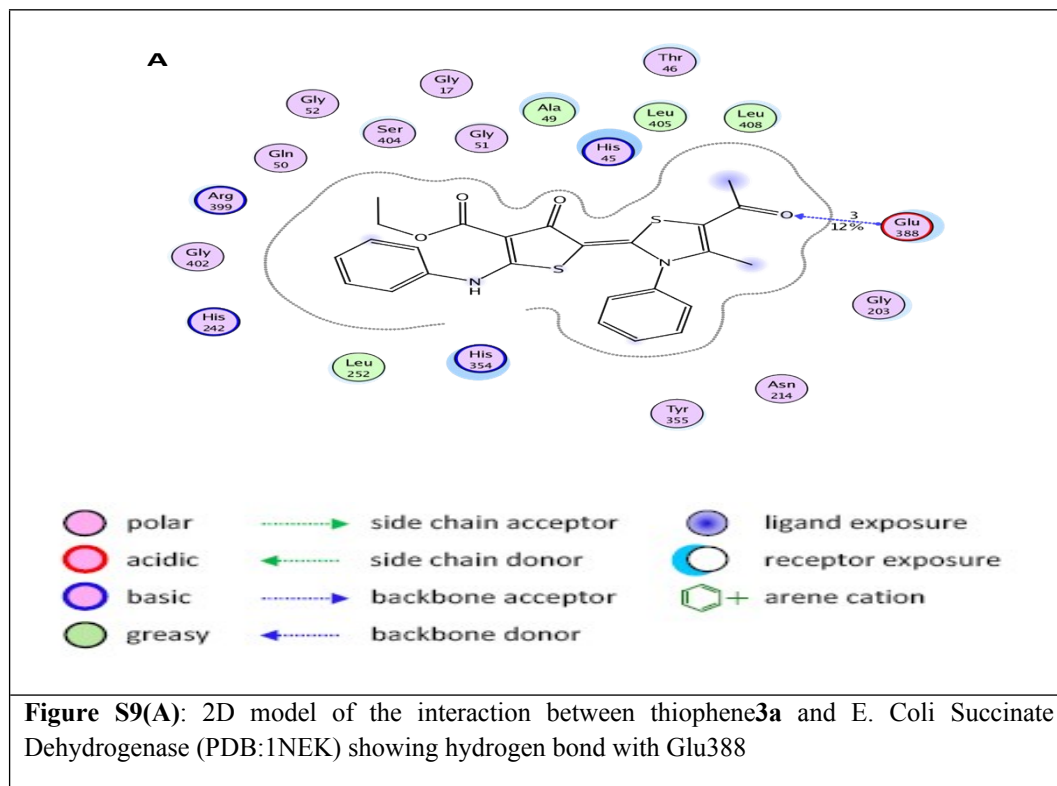

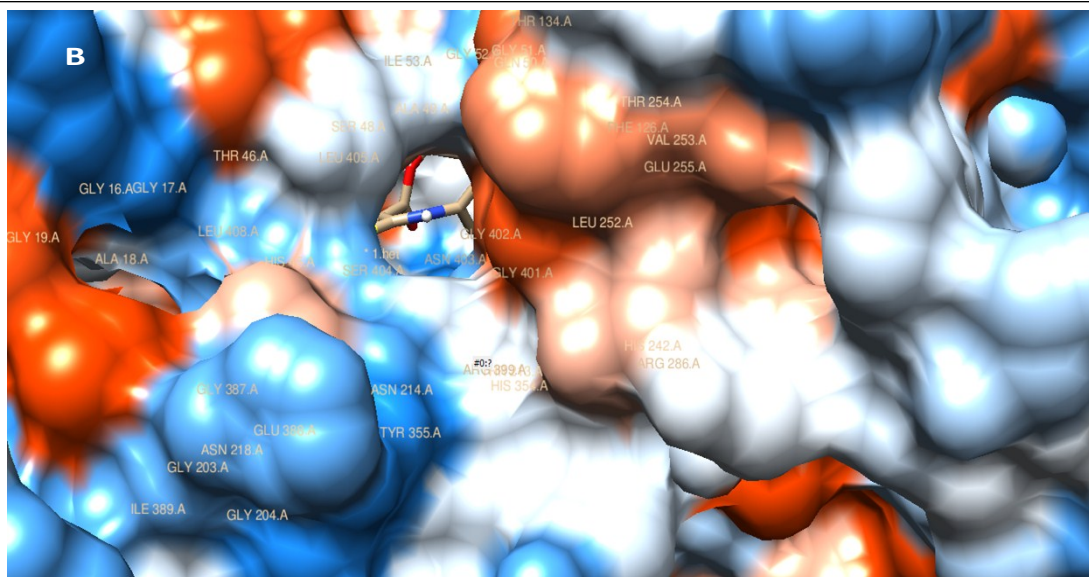

**Figure S9(B):** 3D model of the interaction between compound **3a** and E. Coli Succinate Dehydrogenase protein indicated that thiophene **3a** was embedded into the E. Coli Succinate Dehydrogenase protein active pocket.

Also, the binding model of compound **3b** with E. coli succinate dehydrogenase protein are presented in figure S10(A,B). In this binding model, compound **3b** was well bound to the E. coli succinate dehydrogenase protein through two hydrogen bonds, the first one between oxygen atom of the carbonyl group of the thiophene ring with His45 residue (2.53 Å) with a strength of 24%, while the second hydrogen bond between the same oxygen atom and Thr213 (2.84 Å) with a strength of 32%

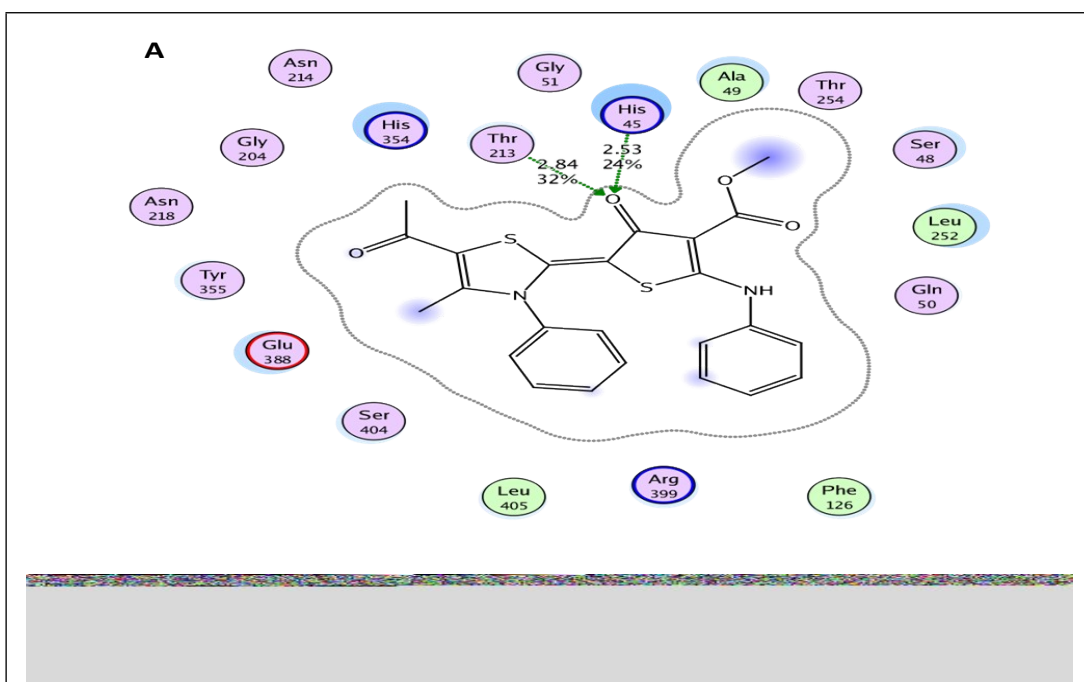

**Figure S10(A):** 2D model of the interaction between thiophene **3b** and E. Coli Succinate Dehydrogenase (PDB:1NEK) showing two hydrogen bonds with of His45 and Thr213 residues.



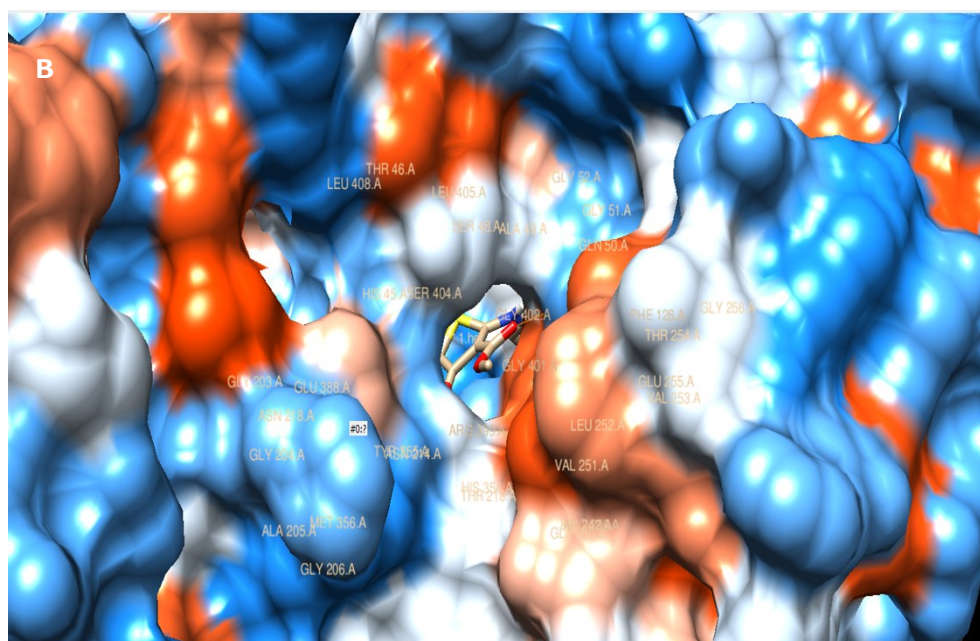

**Figure S10(B):** 3D model of the interaction between thiophene **3b** and E. Coli Succinate Dehydrogenase protein indicated that **3b** was embedded into the E. Coli Succinate Dehydrogenase protein active pocket.

This result indicated that these two hydrogen bonding interactions with the active site residues of *E. coli* succinate dehydrogenase might be one of the reasons for the good antibacterial and antifungal activities shown by this compound in the series (table 3,4).

Part 4: X-ray data for the synthesized compound **3a** and **3b**

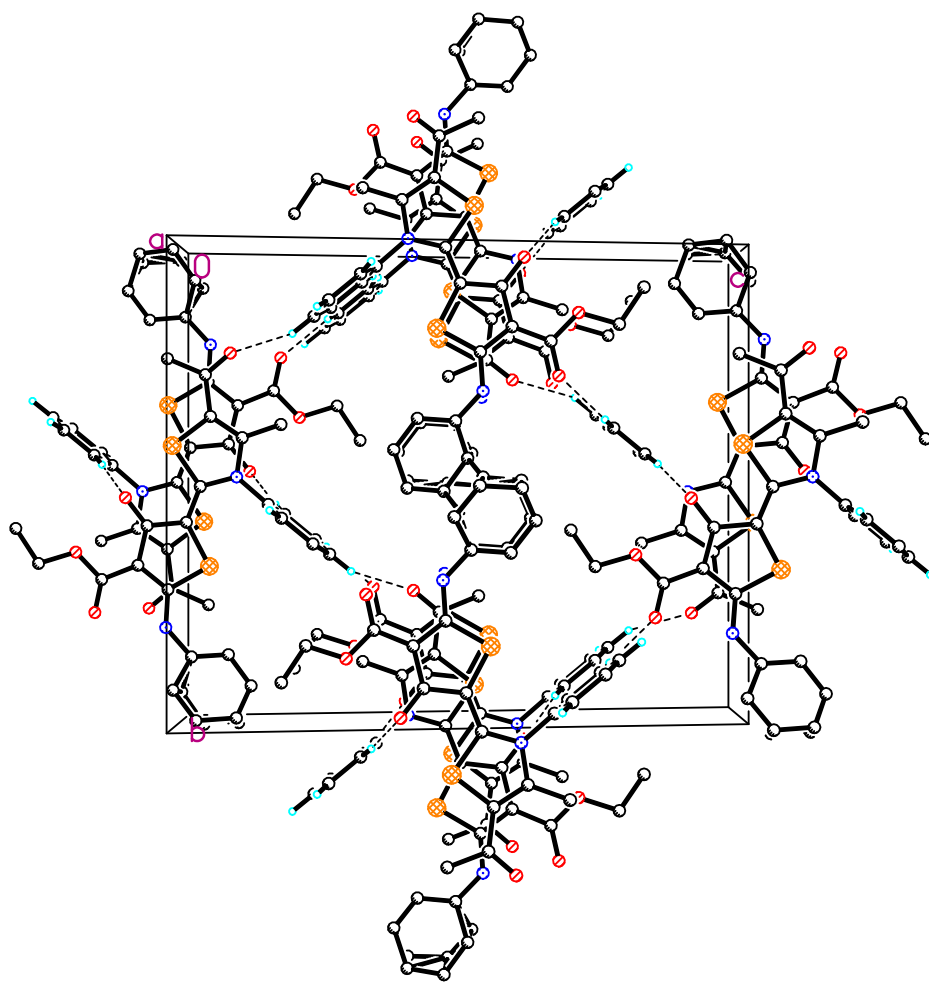

**Figure S11:** The packing of **3a** molecules in crystal lattice

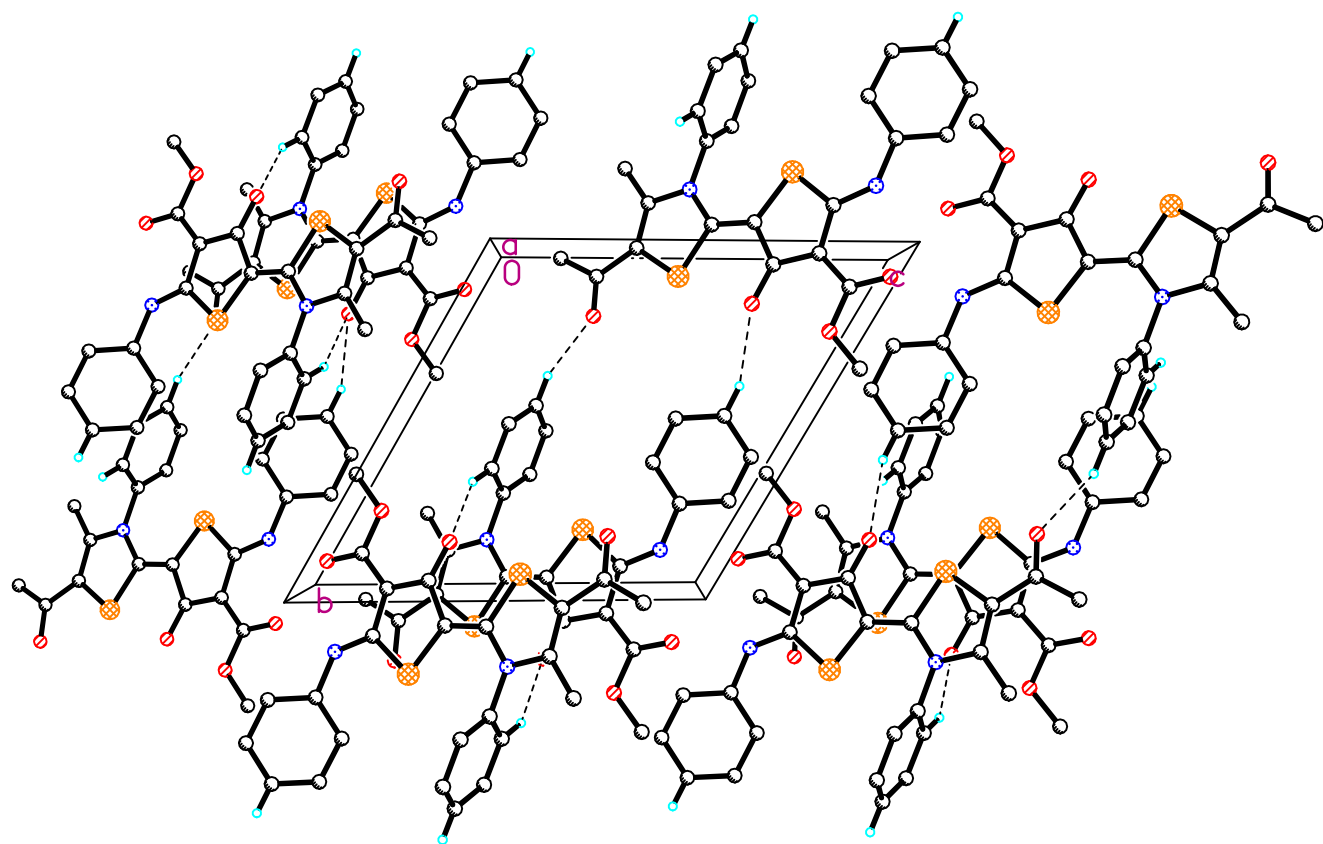

**Figure S12:** The packing of **3b** molecules in crystal lattice

**Table S1.** Fractional atomic coordinates and isotropic or equivalent isotropic displacement parameters ( $\text{\AA}^2$ ) of **3a**

|     | <i>X</i>  | <i>Y</i>  | <i>Z</i> | $U_{\text{iso}}^*/U_{\text{eq}}$ | Occ. (<1) |
|-----|-----------|-----------|----------|----------------------------------|-----------|
| S1  | 2504 (2)  | 10824 (1) | 4807 (1) | 18 (1)                           |           |
| C1  | 2869 (6)  | 9955 (3)  | 5311 (2) | 15 (1)                           |           |
| O1  | 4332 (6)  | 12762 (2) | 5882 (2) | 32 (1)                           |           |
| N1  | 3654 (5)  | 10157 (2) | 5972 (2) | 16 (1)                           |           |
| S2  | 2665 (2)  | 8255 (1)  | 5463 (1) | 18 (1)                           |           |
| N2  | 1572 (6)  | 6937 (2)  | 4657 (2) | 25 (1)                           |           |
| O2  | 1317 (5)  | 9716 (2)  | 3938 (2) | 26 (1)                           |           |
| C2  | 4010 (6)  | 10985 (3) | 6082 (2) | 17 (1)                           |           |
| O3  | 91 (5)    | 7240 (2)  | 3343 (2) | 29 (1)                           |           |
| C3  | 3475 (6)  | 11437 (3) | 5510 (2) | 18 (1)                           |           |
| C4  | 3576 (7)  | 12318 (3) | 5423 (2) | 21 (1)                           |           |
| O4  | -52 (5)   | 8542 (2)  | 2999 (2) | 25 (1)                           |           |
| C5  | 2715 (7)  | 12666 (3) | 4731 (2) | 26 (1)                           |           |
| C6  | 4880 (7)  | 11260 (3) | 6781 (2) | 25(1)                            |           |
| C7  | 3876 (7)  | 9576 (3)  | 6533 (2) | 19 (1)                           |           |
| C8  | 5667 (7)  | 9293 (3)  | 6809 (2) | 25 (1)                           |           |
| C9  | 5810 (9)  | 8752 (3)  | 7359 (3) | 35 (1)                           |           |
| C10 | 4211 (10) | 8520 (3)  | 7622 (3) | 38 (1)                           |           |
| C11 | 2462 (9)  | 8814 (3)  | 7336 (3) | 34 (1)                           |           |
| C12 | 2277 (7)  | 9398 (3)  | 6784 (2) | 25 (1)                           |           |
| C13 | 2382 (6)  | 9193 (3)  | 5051 (2) | 1717 (1)                         |           |
| C14 | 1583 (6)  | 9115 (3)  | 4328 (2) | 20 (1)                           |           |
| C15 | 1191 (6)  | 8269 (3)  | 4150 (2) | 18 (1)                           |           |
| C16 | 1735 (6)  | 7752 (3)  | 4702 (2) | 17 (1)                           |           |
| C17 | 373 (6)   | 7956 (3)  | 3477 (2) | 20 (1)                           |           |
| C18 | -788 (8)  | 8293 (3)  | 2304 (2) | 32 (1)                           |           |
| C19 | -1150 (9) | 9047 (3)  | 1882 (3) | 35 (1)                           |           |
| C20 | 2202 (12) | 6320 (3)  | 5134 (3) | 51 (2)                           |           |
| C21 | 2780 (9)  | 6376 (3)  | 5803 (3) | 38 (1)                           |           |
| C22 | 3395 (8)  | 5724 (3)  | 6220 (3) | 34 (1)                           |           |

|      |           |           |           |          |       |
|------|-----------|-----------|-----------|----------|-------|
| C23  | 4095 (17) | 5074 (6)  | 5981 (7)  | 37 (3)   | 0.500 |
| C24  | 4086 (15) | 5027 (6)  | 5277 (7)  | 35 (2)   | 0.500 |
| C25  | 3325 (14) | 5651 (6)  | 4851 (6)  | 28 (2)   | 0.500 |
| C23A | 2724 (16) | 4922 (7)  | 5982 (6)  | 32 (2)   | 0.500 |
| C24A | 1578 (15) | 4857 (6)  | 5336 (6)  | 32 (2)   | 0.500 |
| C25A | 1148 (14) | 5541 (6)  | 4925 (5)  | 26 (2)   | 0.500 |
| H2   | 1050 (80) | 6820 (40) | 4230 (30) | 27 (15)* |       |
| H5A  | 1385      | 12498     | 4612      | 39(15)*  |       |
| H5B  | 3415      | 12465     | 4382      | 39*      |       |
| H5C  | 2787      | 13261     | 4750      | 39*      |       |
| H6A  | 6236      | 11131     | 6866      | 37*      |       |
| H6B  | 4266      | 10983     | 7121      | 37*      |       |
| H6C  | 4711      | 11849     | 6817      | 37*      |       |
| H8   | 6754      | 9460      | 6631      | 31*      |       |
| H9   | 7016      | 8539      | 7558      | 41*      |       |
| H10  | 4334      | 8156      | 8001      | 46*      |       |
| H11  | 1372      | 8648      | 7513      | 41*      |       |
| H12  | 1071      | 9573      | 6587      | 30*      |       |
| H18A | -1979     | 7982      | 2287      | 38*      |       |
| H18B | 142       | 7943      | 2127      | 38*      |       |
| H19A | -2126     | 9373      | 2046      | 52*      |       |
| H19B | -1585     | 8900      | 1400      | 52*      |       |
| H19C | 24        | 9364      | 1924      | 52*      |       |
| H21  | 2772      | 6897      | 6010      | 46*      |       |
| H22  | 3307      | 5749      | 6693      | 41*      |       |
| H23  | 4598      | 4644      | 6280      | 44*      | 0.500 |
| H24  | 4605      | 4464      | 5090      | 41*      | 0.500 |
| H25  | 3497      | 5665      | 4386      | 34*      | 0.500 |
| H23A | 3057      | 4454      | 6260      | 39*      | 0.500 |
| H24A | 1088      | 4342      | 5176      | 38*      | 0.500 |
| H25A | 209       | 5517      | 4521      | 31*      | 0.500 |

**Table S2:** Fractional atomic coordinates and isotropic or equivalent isotropic displacement parameters of **3b** ( $\text{\AA}^2$ )

|     | <i>X</i>  | <i>Y</i>  | <i>Z</i> | $U_{iso}^*/U_{eq}$ | Occ. (<1) |
|-----|-----------|-----------|----------|--------------------|-----------|
| S1  | 2504 (2)  | 10824 (1) | 4807 (1) | 18 (1)             |           |
| C1  | 2869 (6)  | 9955 (3)  | 5311 (2) | 15 (1)             |           |
| O1  | 4332 (6)  | 12762 (2) | 5882 (2) | 32 (1)             |           |
| N1  | 3654 (5)  | 10157 (2) | 5972 (2) | 16 (1)             |           |
| S2  | 2665 (2)  | 8255 (1)  | 5463 (1) | 18 (1)             |           |
| N2  | 1572 (6)  | 6937 (2)  | 4657 (2) | 25 (1)             |           |
| O2  | 1317 (5)  | 9716 (2)  | 3938 (2) | 26 (1)             |           |
| C2  | 4010 (6)  | 10985 (3) | 6082 (2) | 17 (1)             |           |
| O3  | 91 (5)    | 7240 (2)  | 3343 (2) | 29 (1)             |           |
| C3  | 3475 (6)  | 11437 (3) | 5510 (2) | 18 (1)             |           |
| C4  | 3576 (7)  | 12318 (3) | 5423 (2) | 21 (1)             |           |
| O4  | -52 (5)   | 8542 (2)  | 2999 (2) | 25 (1)             |           |
| C5  | 2715 (7)  | 12666 (3) | 4731 (2) | 26 (1)             |           |
| C6  | 4880 (7)  | 11260 (3) | 6781 (2) | 25(1)              |           |
| C7  | 3876 (7)  | 9576 (3)  | 6533 (2) | 19 (1)             |           |
| C8  | 5667 (7)  | 9293 (3)  | 6809 (2) | 25 (1)             |           |
| C9  | 5810 (9)  | 8752 (3)  | 7359 (3) | 35 (1)             |           |
| C10 | 4211 (10) | 8520 (3)  | 7622 (3) | 38 (1)             |           |
| C11 | 2462 (9)  | 8814 (3)  | 7336 (3) | 34 (1)             |           |
| C12 | 2277 (7)  | 9398 (3)  | 6784 (2) | 25 (1)             |           |
| C13 | 2382 (6)  | 9193 (3)  | 5051 (2) | 1717 (1)           |           |
| C14 | 1583 (6)  | 9115 (3)  | 4328 (2) | 20 (1)             |           |
| C15 | 1191 (6)  | 8269 (3)  | 4150 (2) | 18 (1)             |           |
| C16 | 1735 (6)  | 7752 (3)  | 4702 (2) | 17 (1)             |           |
| C17 | 373 (6)   | 7956 (3)  | 3477 (2) | 20 (1)             |           |
| C18 | -788 (8)  | 8293 (3)  | 2304 (2) | 32 (1)             |           |
| C19 | -1150 (9) | 9047 (3)  | 1882 (3) | 35 (1)             |           |
| C20 | 2202 (12) | 6320 (3)  | 5134 (3) | 51 (2)             |           |
| C21 | 2780 (9)  | 6376 (3)  | 5803 (3) | 38 (1)             |           |
| C22 | 3395 (8)  | 5724 (3)  | 6220 (3) | 34 (1)             |           |
| C23 | 4095 (17) | 5074 (6)  | 5981 (7) | 37 (3)             | 0.500     |
| C24 | 4086 (15) | 5027 (6)  | 5277 (7) | 35 (2)             | 0.500     |
| C25 | 3325 (14) | 5651 (6)  | 4851 (6) | 28 (2)             | 0.500     |

|      |           |           |           |          |       |
|------|-----------|-----------|-----------|----------|-------|
| C23A | 2724 (16) | 4922 (7)  | 5982 (6)  | 32 (2)   | 0.500 |
| C24A | 1578 (15) | 4857 (6)  | 5336 (6)  | 32 (2)   | 0.500 |
| C25A | 1148 (14) | 5541 (6)  | 4925 (5)  | 26 (2)   | 0.500 |
| H2   | 1050 (80) | 6820 (40) | 4230 (30) | 27 (15)* |       |
| H5A  | 1385      | 12498     | 4612      | 39(15)*  |       |
| H5B  | 3415      | 12465     | 4382      | 39*      |       |
| H5C  | 2787      | 13261     | 4750      | 39*      |       |
| H6A  | 6236      | 11131     | 6866      | 37*      |       |
| H6B  | 4266      | 10983     | 7121      | 37*      |       |
| H6C  | 4711      | 11849     | 6817      | 37*      |       |
| H8   | 6754      | 9460      | 6631      | 31*      |       |
| H9   | 7016      | 8539      | 7558      | 41*      |       |
| H10  | 4334      | 8156      | 8001      | 46*      |       |
| H11  | 1372      | 8648      | 7513      | 41*      |       |
| H12  | 1071      | 9573      | 6587      | 30*      |       |
| H18A | -1979     | 7982      | 2287      | 38*      |       |
| H18B | 142       | 7943      | 2127      | 38*      |       |
| H19A | -2126     | 9373      | 2046      | 52*      |       |
| H19B | -1585     | 8900      | 1400      | 52*      |       |
| H19C | 24        | 9364      | 1924      | 52*      |       |
| H21  | 2772      | 6897      | 6010      | 46*      |       |
| H22  | 3307      | 5749      | 6693      | 41*      |       |
| H23  | 4598      | 4644      | 6280      | 44*      | 0.500 |
| H24  | 4605      | 4464      | 5090      | 41*      | 0.500 |
| H25  | 3497      | 5665      | 4386      | 34*      | 0.500 |
| H23A | 3057      | 4454      | 6260      | 39*      | 0.500 |
| H24A | 1088      | 4342      | 5176      | 38*      | 0.500 |
| H25A | 209       | 5517      | 4521      | 31*      | 0.500 |

**Table S3:** Atomic displacement parameters of **3a** ( $\text{\AA}^2$ )

|    | $U^{11}$ | $U^{22}$ | $U^{33}$ | $U^{12}$ | $U^{13}$ | $U^{23}$ |
|----|----------|----------|----------|----------|----------|----------|
| S1 | 23 (1)   | 16(1)    | 13 (1)   | 1 (1)    | -2 (1)   | 0 (1)    |
| C1 | 16 (2)   | 19 (2)   | 11 (2)   | 4 (2)    | 4 (1)    | 0 (1)    |
| O1 | 53 (2)   | 15 (2)   | 25 (2)   | -5 (2)   | -2 (2)   | -3 (1)   |



|      |        |        |        |        |         |        |
|------|--------|--------|--------|--------|---------|--------|
| N1   | 20 (2) | 16 (2) | 13 (2) | 1 (1)  | 2 (1)   | 0 (1)  |
| S2   | 22 (1) | 15 (1) | 16 (1) | -1 (1) | 2 (1)   | 0 (1)  |
| N2   | 37 (2) | 14 (2) | 21 (2) | -1 (2) | 0 (2)   | -2 (2) |
| O2   | 38 (2) | 21 (2) | 17 (2) | 0 (1)  | 4 (1)   | 2 (14) |
| C2   | 20 (2) | 17 (2) | 16 (2) | -2 (2) | 4 (2)   | -5 (2) |
| O3   | 37 (2) | 21 (2) | 26 (2) | -1 (1) | 2 (2)   | -6 (1) |
| C3   | 19 (2) | 17 (2) | 17 (2) | 1 (2)  | 1 (2)   | -4 (2) |
| C4   | 24 (2) | 19 (2) | 21 (2) | 1 (2)  | 7 (2)   | 3 (2)  |
| O4   | 33 (2) | 25 (2) | 15 (2) | 0 (1)  | -2 (1)  | -6 (1) |
| C5   | 27 (2) | 24 (2) | 26 (2) | 1 (2)  | 3 (2)   | 8 (2)  |
| C6   | 37 (3) | 20 (2) | 15 (2) | -5 (2) | 0 (2)   | -4 (2) |
| C7   | 27 (2) | 15 (2) | 13 (2) | 1 (2)  | 1 (2)   | 1 (1)  |
| C8   | 32 (3) | 23 (2) | 19 (2) | 3 (2)  | -1 (2)  | -1 (2) |
| C9   | 52 (3) | 21 (2) | 24 (2) | 11 (2) | -11 (2) | 1 (2)  |
| C10  | 76 (4) | 19 (2) | 16 (2) | 4 (3)  | -1 (2)  | 4 (2)  |
| C11  | 56 (3) | 25 (2) | 23 (2) | -2 (2) | 11 (2)  | 3 (2)  |
| C12  | 30 (2) | 25 (2) | 20 (2) | 0 (2)  | 5 (2)   | 2 (2)  |
| C13  | 22 (2) | 15 (2) | 14 (2) | -1 (2) | 3 (2)   | 3 (1)  |
| C14  | 23 (2) | 20 (2) | 16 (2) | 2 (2)  | 0 (2)   | -6 (2) |
| C15  | 21 (2) | 18 (2) | 16 (2) | 3 (2)  | 1 (2)   | -4 (2) |
| C16  | 16 (2) | 18 (2) | 18 (2) | 0 (2)  | 3 (2)   | -3 (2) |
| C17  | 18 (2) | 22 (2) | 21 (2) | 4 (2)  | 4 (2)   | -5 (2) |
| C18  | 43 (3) | 34 (3) | 18 (2) | -1 (2) | 1 (2)   | -9 (2) |
| C19  | 51 (3) | 34 (3) | 19 (2) | 3 (2)  | 4 (2)   | -3 (2) |
| C20  | 96 (6) | 18 (2) | 30 (3) | 7(3)   | -12 (3) | -1 (2) |
| C21  | 57 (4) | 19 (2) | 34 (3) | -4 (2) | -5 (3)  | -3 (2) |
| C22  | 40 (3) | 33 (3) | 30 (3) | -2 (2) | 5 (2)   | 9 (2)  |
| C23  | 37 (6) | 19 (5) | 52 (7) | 3 (4)  | 0 (5)   | 8 (5)  |
| C24  | 29 (5) | 15 (4) | 62 (6) | 5 (4)  | 12 (5)  | 4 (4)  |
| C25  | 21 (4) | 24 (5) | 42 (6) | -5 (4) | 13 (4)  | -2 (4) |
| C23A | 32 (6) | 28 (5) | 40 (6) | 8(4)   | 13 (5)  | 5 (4)  |
| C24A | 27 (5) | 20 (4) | 52 (6) | -4 (4) | 14 (5)  | -6 (4) |
| C25A | 25 (5) | 22 (4) | 31 (5) | -5 (4) | 5 (4)   | -7 (4) |

**Table S4:** Geometric parameters of **3a** (Å, °)

|         |           |             |           |
|---------|-----------|-------------|-----------|
| S1—C1   | 1.737 (4) | C11—C12     | 1.401 (7) |
| S1—C3   | 1.759 (4) | C11—H11     | 0.9500    |
| C1—N1   | 1.370 (5) | C12—H12     | 0.9500    |
| C1—C13  | 1.375 (6) | C13—C14     | 1.448(6)  |
| O1—C4   | 1.215 (6) | C14—C15     | 1.451 (6) |
| N1—C2   | 1.394 (5) | C15—C16     | 1.384 (6) |
| N1—C7   | 1.451 (5) | C15—C17     | 1.451 (6) |
| S2—C13  | 1.740 (4) | C18—C19     | 1.492 (8) |
| S2—C16  | 1.744 (4) | C18—H18A    | 0.9900    |
| N2—C16  | 1.347 (6) | C18—H18B    | 0.9900    |
| N2—C20  | 1.404 (7) | C19—H19A    | 0.9800    |
| N2—H2   | 0.88 (6)  | C19—H19B    | 0.9800    |
| O2—C14  | 1.248 (5) | C19—H19C    | 0.9800    |
| C2—C3   | 1.352 (6) | C20—C21     | 1.319(8)  |
| C2—C6   | 0.484(6)  | C20—C25A    | 1.508(11) |
| O3—C17  | 1.216 (6) | C20—C25     | 1.527(12) |
| C3—C4   | 1.462 (6) | C21—C22     | 1.376(7)  |
| C4—C5   | 1.512 (6) | C21—H21     | 0.9500    |
| O4—C17  | 1.347 (6) | C22—C23     | 1.305(13) |
| O4—C18  | 1.442 (5) | C22—C23A    | 1.453(13) |
| C5—H5A  | 0.9800    | C22—H22     | 0.9500    |
| C5—H5B  | 0.9800    | C23—C24     | 1.396(18) |
| C5—H5C  | 0.9800    | C23—H23     | 0.9500    |
| C6—H6A  | 0.9800    | C24—C25     | 1.377(15) |
| C6—H6B  | 0.9800    | C24—C24#1   | 1.85(2)   |
| C6—H6C  | 0.9800    | C24—H24     | 0.9500    |
| C7—C12  | 1.375 (7) | C25—H25     | 0.9500    |
| C7—C8   | 1.383 (7) | C23A—C24A   | 1.396(16) |
| C8—C9   | 1.396 (7) | C23A—H23A   | 0.9500    |
| C8—H8   | 0.9500    | C24A—C25A   | 1.390(15) |
| C9—C10  | 1.393(9)  | C24A—C25A#2 | 2.037(14) |
| C9—H9   | 0.9500    | C24A—H24A   | 0.9500    |
| C10—C11 | 1.369(9)  | C25A—C24A#2 | 2.037(14) |
| C10—H10 | 0.9500    | C25A—H25A   | 0.9500    |

|            |           |               |           |
|------------|-----------|---------------|-----------|
| C1—S1—C3   | 91.1 (2)  | N2—C16—C15    | 123.3 (4) |
| N1—C1—C13  | 127.8 (4) | N2—C16—S2     | 123.0 (3) |
| N1—C1—S1   | 110.0 (3) | C15—C16—S2    | 113.6 (3) |
| C13—C1—S1  | 122.1 (3) | O3—C17—O4     | 122.0 (4) |
| C1—N1—C2   | 114.7 (3) | O3—C17—C15    | 124.7 (4) |
| C1—N1—C7   | 122.7 (4) | O4—C17—C15    | 113.3(4)  |
| C2—N1—C7   | 122.2 (3) | O4—C18—C19    | 107.2(4)  |
| C13—S2—C16 | 91.2 (2)  | O4—C18—H18A   | 110.3     |
| C16—N2—C20 | 131.3 (4) | C19—C18—H18A  | 110.3     |
| C16—N2—H2  | 107 (4)   | O4—C18—H18B   | 110.3     |
| C20—N2—H2  | 121 (4)   | C19—C18—H18B  | 110.3     |
| C3—C2—N1   | 113.0 (4) | H18A—C18—H18B | 108.5     |
| C3—C2—C6   | 128.5 (4) | C18—C19—H19A  | 109.5     |
| N1—C2—C6   | 118.5 (4) | C18—C19—H19B  | 109.5     |
| C2—C3—C4   | 129.1 (4) | H19A—C19—H19B | 109.5     |
| C2—C3—S1   | 111.1 (3) | C18—C19—H19C  | 109.5     |
| C4—C3—S1   | 119.8 (3) | H19A—C19—H19C | 109.5     |
| O1—C4—C3   | 122.2 (4) | H19B—C19—H19C | 109.5     |
| O1—C4—C5   | 120.4 (4) | C21—C20—N2    | 129.1(5)  |
| C3—C4—C5   | 117.4 (4) | C21—C20—C25A  | 112.8(6)  |
| C17—O4—C18 | 117.8 (4) | N2—C20—C25A   | 110.1(6)  |
| C4—C5—H5A  | 109.5     | C21—C20—C25   | 109.0(7)  |
| C2—C5—H5B  | 109.5     | N2—C20—C25    | 113.7(6)  |
| H5A—C5—H5B | 109.5     | C25A—C20—C25  | 63.8(6)   |
| C4—C5—H5C  | 109.5     | C20—C21—C22   | 123.9(5)  |
| H5A—C5—H5C | 109.5     | C20—C21—H21   | 118.1     |
| H5B—C5—H5C | 109.5     | C22—C21—H21   | 118.1     |
| C2—C6—H6A  | 109.5     | C23—C22—C21   | 121.7(7)  |
| C2—C6—H6B  | 109.5     | C23—C22—C23A  | 42.7(7)   |
| H6A—C6—H6B | 109.5     | C21—C22—C23A  | 117.5(6)  |
| C2—C6—H6C  | 109.5     | C23—C22—H22   | 119.2     |
| H6A—C6—H6C | 109.5     | C21—C22—H22   | 119.2     |
| H6B—C6—H6C | 109.5     | C23A—C22—H22  | 106.3     |
| C12—C7—C8  | 123.0 (4) | C22—C23—C24   | 118.1(9)  |

|             |           |                  |           |
|-------------|-----------|------------------|-----------|
| C12—C7—N1   | 117.5 (4) | C22—C23—H23      | 120.9     |
| C8—C7—N1    | 119.5 (4) | C24—C23—H23      | 120.9     |
| C7—C8—C9    | 117.2 (5) | C25—C24—C23      | 120.1(10) |
| C7—C8—H8    | 121.4     | C25—C24—C24#1    | 85.4(9)   |
| C9—C8—H8    | 121.4     | C23—C24—C24#1    | 135.6(12) |
| C10—C9—C8   | 120.9 (5) | C25—C24—H24      | 120.0     |
| C10—C9—H9   | 119.5     | C23—C24—H24      | 120.0     |
| C8—C9—H9    | 119.5     | C24#1—C24—H24    | 50.6      |
| C11—C10—C9  | 120.1(5)  | C24—C25—C20      | 119.3(9)  |
| C11—C10—H10 | 119.9     | C24—C25—H25      | 120.3     |
| C9—C10—H10  | 119.9     | C20—C25—H25      | 120.3     |
| C10—C11—C12 | 120.1 (6) | C24A—C23A—C22    | 118.2(9)  |
| C10—C11—H11 | 119.9     | C24A—C23A—H23A   | 120.9     |
| C12—C11—H11 | 119.9     | C22—C23A—H23A    | 120.9     |
| C7—C12—C11  | 118.6(5)  | C25A—C24A—H23A   | 120.5(9)  |
| C7—C12—H12  | 120.7     | C25A—C24A—C25A#2 | 90.5(7)   |
| C11—C12—H12 | 120.7     | C23A—C24A—H25A#2 | 129.7(9)  |
| C1—C13—C14  | 118.7 (4) | C25A—C24A—H24A   | 119.7     |
| C1—C13—S2   | 129.1 (3) | C23A—C24A—H24A   | 119.7     |
| C14—C13—S2  | 112.2 (3) | C25A#2—C24A—H24A | 49.3      |
| O2—C14—C13  | 122.1(4)  | C24A—C25A—C20    | 118.6(8)  |
| O2—C14—C15  | 127.4 (4) | C24A—C25A—C24A#2 | 89.5(8)   |
| C13—C14—C15 | 110.5(4)  | C20—C25A—C24A#2  | 138.9(7)  |
| C16—C15—C17 | 121.2(4)  | C24A—C25A—H25A   | 120.7     |
| C16—C15—C14 | 112.5(4)  | C20—C25A—H25A    | 120.7     |
| C17—C15—C14 | 126.3(4)  | C24A#2—C25A—H25A | 43.1      |

**Table S5:**Hydrogen-bond geometry of **3a**(Å, °)

| <i>D</i> —H··· <i>A</i>     | <i>D</i> —H | H··· <i>A</i> | <i>D</i> ··· <i>A</i> | <i>D</i> —H··· <i>A</i> |
|-----------------------------|-------------|---------------|-----------------------|-------------------------|
| N2—H2···O3                  | 0.88 (6)    | 1.90 (6)      | 2.676 (5)             | 146 (6)                 |
| C6—H6C···O1                 | 0.98        | 2.36          | 3.028 (6)             | 125                     |
| C8—H8···O2 <sup>i</sup>     | 0.95        | 2.36          | 3.262 (6)             | 159                     |
| C10—H10···O1 <sup>ii</sup>  | 0.95        | 2.34          | 3.210 (7)             | 152                     |
| C11—H11···O3 <sup>iii</sup> | 0.95        | 2.49          | 3.325 (7)             | 146                     |
| C12—H12···O2 <sup>iv</sup>  | 0.95        | 2.18          | 3.113 (6)             | 167                     |

C21—H21···S2                      0.95                      2.48                      3.161 (5)                      129

Symmetry codes: (i)  $-x+1, -y+2, -z+1$ ; (ii)  $-x+1, y-1/2, -z+3/2$ ; (iii)  $x, -y+3/2, z+1/2$ ; (iv)  $-x, -y+2, -z+1$ .

**Table S6:** Fractional atomic coordinates and isotropic or equivalent isotropic displacement parameters of **3b** (Å<sup>2</sup>)

|     | <i>x</i>  | <i>Y</i>  | <i>z</i> | <i>U</i> <sub>iso</sub> */ <i>U</i> <sub>eq</sub> | Occ. (<1) |
|-----|-----------|-----------|----------|---------------------------------------------------|-----------|
| S1  | 1563 (1)  | 1963 (1)  | 3926 (1) | 44 (1)                                            |           |
| S2  | 2404 (1)  | -875 (1)  | 5184 (1) | 42 (1)                                            |           |
| O1  | -2418 (3) | -1065 (2) | 334 (1)  | 68 (1)                                            |           |
| O2  | -2097 (3) | -2515 (2) | 966 (2)  | 56 (1)                                            |           |
| O3  | 305 (3)   | -1696 (2) | 3078 (2) | 54 (1)                                            |           |
| O4  | 3509 (3)  | -1953 (2) | 6670 (3) | 68 (1)                                            |           |
| N1  | -582 (3)  | 1457 (3)  | 1834 (3) | 45 (1)                                            |           |
| C1  | 34 (3)    | 970 (3)   | 2538 (3) | 39 (1)                                            |           |
| C2  | -446 (3)  | -355 (3)  | 2216 (3) | 38 (1)                                            |           |
| C3  | 450 (3)   | -616 (3)  | 3117 (3) | 39 (1)                                            |           |
| C4  | 1607 (3)  | 589 (3)   | 4124 (3) | 39 (1)                                            |           |
| C5  | 2562 (3)  | 576 (3)   | 5104 (3) | 37 (1)                                            |           |
| C6  | 3731 (3)  | 1611 (2)  | 6125 (2) | <b>25 (1)</b>                                     |           |
| C7  | 4543 (3)  | 1280 (3)  | 6939 (3) | 42 (1)                                            |           |
| C8  | 3962 (3)  | -16 (3)   | 6585 (3) | 43 (1)                                            |           |
| C9  | 4331 (4)  | -807 (3)  | 7162 (3) | 50 (1)                                            |           |
| C10 | 5686 (5)  | -234 (4)  | 8319 (4) | 74 (1)                                            |           |
| C11 | 5908 (4)  | 2335 (3)  | 8014 (3) | 62 (1)                                            |           |
| C12 | -1718 (4) | -1307 (3) | 1100 (3) | 44 (1)                                            |           |
| C13 | -3278 (5) | -3535 (3) | -189 (4) | 75 (1)                                            |           |
| C14 | -237 (3)  | 2748 (3)  | 2009 (3) | 42 (1)                                            |           |
| C15 | 321 (4)   | 3901 (3)  | 3208 (3) | 54 (1)                                            |           |
| C16 | 619 (4)   | 5127 (3)  | 3272 (4) | 63 (1)                                            |           |
| C17 | 330 (4)   | 5205 (4)  | 2161 (5) | 68 (1)                                            |           |
| C18 | -269 (5)  | 4057 (4)  | 967 (4)  | 69 (1)                                            |           |
| C19 | -546 (4)  | 2830 (3)  | 890 (3)  | 56 (1)                                            |           |
| C20 | 4010 (3)  | 2972 (3)  | 6389 (3) | 38 (1)                                            |           |

|      |            |          |           |         |
|------|------------|----------|-----------|---------|
| C21  | 5220 (3)   | 3495 (3) | 6013 (3)  | 44 (1)  |
| C22  | 5458 (4)   | 4772 (3) | 6239 (3)  | 54 (1)  |
| C23  | 4500 (4)   | 5507 (3) | 6826 (3)  | 55 (1)  |
| C24  | 3309 (4)   | 4976 (3) | 7207 (3)  | 50 (1)  |
| C25  | 3050 (3)   | 3700 (3) | 6995 (3)  | 42 (1)  |
| H10A | 5753       | -896     | 8559      | 111     |
| H10B | 5546       | 529      | 9041      | 111     |
| H10C | 6623       | 29       | 8096      | 111     |
| H11A | 6359       | 1971     | 8496      | 93      |
| H11B | 5576       | 3071     | 8592      | 93      |
| H11C | 6665       | 2638     | 7644      | 93      |
| H13A | -3464      | -4363    | -192      | 112     |
| H13B | -2939      | -3640    | -953      | 112     |
| H13C | -4218      | -3279    | -191      | 112     |
| H15A | 497        | 3858     | 3970      | 64      |
| H16A | 1021       | 5906     | 4081      | 75      |
| H17A | 539        | 6032     | 2214      | 81      |
| H18A | -488       | 4106     | 211       | 83      |
| H19A | -943       | 2054     | 79        | 67      |
| H21A | 5862       | 2990     | 5613      | 53      |
| H22A | 6270       | 5142     | 5996      | 64      |
| H23A | 4656       | 6368     | 6966      | 66      |
| H24A | 2673       | 5485     | 7611      | 60      |
| H25A | 2250       | 3338     | 7254      | 51      |
| H1A  | -1240 (40) | 900 (30) | 1230 (30) | 51 (10) |

**Table S7:** Atomic displacement parameters of **3b** (Å<sup>2</sup>)

|    | $U^{11}$ | $U^{22}$ | $U^{33}$ | $U^{12}$ | $U^{13}$ | $U^{23}$ |
|----|----------|----------|----------|----------|----------|----------|
| S1 | 47 (1)   | 30 (1)   | 46 (1)   | 5 (1)    | -8 (1)   | 21 (1)   |
| S2 | 50 (1)   | 31 (1)   | 47 (1)   | 13 (1)   | 3 (1)    | 22 (1)   |
| O1 | 75 (2)   | 52 (1)   | 59(2)    | 4 (1)    | -23 (1)  | 27 (1)   |
| O2 | 63 (2)   | 37 (1)   | 47 (1)   | -4 (1)   | -7 (1)   | 16 (1)   |
| O3 | 63 (2)   | 30 (1)   | 58 (1)   | 7 (1)    | -8 (1)   | 23 (1)   |
| O4 | 88 (2)   | 52 (2)   | 79 (2)   | 26 (1)   | 11 (2)   | 45 (1)   |

|     |        |        |         |         |         |        |
|-----|--------|--------|---------|---------|---------|--------|
| N1  | 50 (2) | 37 (1) | 42 (2)  | 6 (1)   | -8 (1)  | 22 (1) |
| C1  | 40 (2) | 35 (2) | 38 (2)  | 10 (1)  | 3 (1)   | 19 (1) |
| C2  | 42 (2) | 33 (2) | 34 (2)  | 8 (1)   | 1 (1)   | 16 (1) |
| C3  | 42 (2) | 30 (2) | 41 (2)  | 10 (1)  | 4 (1)   | 16 (1) |
| C4  | 43 (2) | 30 (1) | 43 (2)  | 9 (1)   | 2 (1)   | 20 (1) |
| C5  | 40 (2) | 32 (2) | 41 (2)  | 15 (1)  | 8 (1)   | 20 (1) |
| C6  | 29 (1) | 17 (1) | 26 (1)  | 7 (1)   | -3 (1)  | 11 (1) |
| C7  | 45 (2) | 40 (2) | 41 (2)  | 14 (1)  | 2 (1)   | 20 (1) |
| C8  | 47 (2) | 42 (2) | 43 (2)  | 18 (1)  | 4 (1)   | 23 (1) |
| C9  | 68 (2) | 48 (2) | 48 (2)  | 32 (2)  | 16 (2)  | 29 (2) |
| C10 | 92 (3) | 72 (3) | 68 (2)  | 33 (2)  | -2 (2)  | 45 (2) |
| C11 | 65 (2) | 53 (2) | 55 (2)  | 9 (2)   | -13 (2) | 26 (2) |
| C12 | 51 (2) | 36 (2) | 39 (2)  | 9 (1)   | 3 (1)   | 17 (1) |
| C13 | 74 (3) | 47 (2) | 57 (2)  | -12 (2) | -14 (2) | 8 (2)  |
| C14 | 41 (2) | 36 (2) | 54 (2)  | 13(1)   | 6 (1)   | 26 (1) |
| C15 | 56 (2) | 43 (2) | 58 (2)  | 18 (2)  | 2 (2)   | 25 (2) |
| C16 | 51 (2) | 39 (2) | 88 (3)  | 14 (2)  | 9 (2)   | 26 (2) |
| C17 | 64 (2) | 52 (2) | 112 (3) | 21 (2)  | 34 (2)  | 56 (2) |
| C18 | 88 (3) | 66 (2) | 85 (3)  | 28 (2)  | 32 (2)  | 57 (2) |
| C19 | 68 (2) | 52 (2) | 58 (2)  | 20 (2)  | 16 (2)  | 35 (2) |
| C20 | 38 (2) | 31 (1) | 37 (2)  | 8 (1)   | -5 (1)  | 15 (1) |
| C21 | 42 (2) | 45 (2) | 47 (2)  | 11 (1)  | 7 (1)   | 24 (1) |
| C22 | 46 (2) | 57 (2) | 62 (2)  | 6 (2)   | 4 (2)   | 40 (2) |
| C23 | 57 (2) | 37 (2) | 67 (2)  | 8 (2)   | -6 (2)  | 30 (2) |
| C24 | 47 (2) | 36 (2) | 56 (2)  | 15 (1)  | 1 (2)   | 16 (2) |
| C25 | 40 (2) | 36 (2) | 46 (2)  | 9 (1)   | 5 (1)   | 20 (1) |

**Table S8:** Geometric parameters of **3b** (Å, °)

|        |           |         |           |
|--------|-----------|---------|-----------|
| S1—C1  | 1.739 (3) | C6—C20  | 1.451 (3) |
| S1—C4  | 1.756 (3) | C7—C8   | 1.353 (4) |
| S2—C5  | 1.742 (3) | C7—C11  | 1.498 (4) |
| S2—C8  | 1.759 (3) | C8—C9   | 1.457 (4) |
| O1—C12 | 1.222 (3) | C9—C10  | 1.502 (5) |
| O2—C12 | 1.330 (3) | C14—C15 | 1.376 (4) |
| O2—C13 | 1.442 (4) | C14—C19 | 1.382 (4) |

|            |             |             |           |
|------------|-------------|-------------|-----------|
| O3—C3      | 1.237 (3)   | C15—C16     | 1.385 (4) |
| O4—C9      | 1.223 (4)   | C16—C17     | 1.369 (5) |
| N1—C1      | 1.345 (4)   | C17—C18     | 1.372 (6) |
| N1—C14     | 1.405 (4)   | C18—C19     | 1.380 (4) |
| C1—C2      | 1.387 (4)   | C20—C25     | 1.377 (4) |
| C2—C12     | 1.444 (4)   | C20—C21     | 1.381 (4) |
| C2—C3      | 1.450 (4)   | C21—C22     | 1.371 (4) |
| C3—C4      | 1.443 (4)   | C22—C23     | 1.373 (5) |
| C4—C5      | 1.374(4)    | C23—C24     | 1.376 (5) |
| C5—C6      | 1.374 (4)   | C24—C25     | 1.375 (4) |
| C6—C7      | 1.390 (4)   |             |           |
| C1—S1—C4   | 90.86 (13)  | C7—C8—C9    | 132.8 (3) |
| C5—S2—C8   | 90.43 (13)  | C7—C8—S2    | 112.2 (2) |
| C12—O2—C13 | 116.1 (3)   | C9—C8—S2    | 114.9 (2) |
| C1—N1—C14  | 131.4 (3)   | O4—C9—C8    | 117.9 (3) |
| N1—C1—C2   | 124.0 (3)   | O4—C9—C10   | 120.9 (3) |
| N1—C1—S1   | 122.1 (2)   | C8—C9—C10   | 121.1 (3) |
| C2—C1—S1   | 113.9 (2)   | O1—C12—O2   | 121.2 (3) |
| C1—C2—C12  | 120.8 (2)   | O1—C12—C2   | 125.1 (3) |
| C1—C2—C3   | 112.4 (2)   | O2—C12—C2   | 113.6 (2) |
| C12—C2—C3  | 126.7 (2)   | C15—C14—C19 | 119.5 (3) |
| O3—C3—C4   | 121.9 (3)   | C15—C14—N1  | 124.4 (3) |
| O3—C3—C2   | 127.4 (3)   | C19—C14—N1  | 116.3 (3) |
| C4—C3—C2   | 110.7 (2)   | C14—C15—C16 | 119.6 (3) |
| C5—C4—C3   | 120.4 (2)   | C17—C16—C15 | 120.8 (3) |
| C5—C4—S1   | 127.5 (2)   | C16—C17—C18 | 119.8 (3) |
| C3—C4—S1   | 112.1 (2)   | C17—C18—C19 | 120.0 (4) |
| C4—C5—C6   | 128.1 (2)   | C18—C19—C14 | 120.4 (3) |
| C4—C5—S2   | 121.5 (2)   | C25—C20—C21 | 122.0 (3) |
| C6—C5—S2   | 109.98 (19) | C25—C20—C6  | 119.0 (3) |
| C5—C6—C7   | 115.4 (2)   | C21—C20—C6  | 119.0 (3) |
| C5—C6—C20  | 122.0 (2)   | C22—C21—C20 | 118.8 (3) |
| C7—C6—C20  | 122.5 (2)   | C21—C22—C23 | 120.1 (3) |
| C8—C7—C6   | 111.9 (3)   | C22—C23—C24 | 120.4 (3) |



|           |           |             |           |
|-----------|-----------|-------------|-----------|
| C8—C7—C11 | 129.7 (3) | C25—C24—C23 | 120.6 (3) |
| C6—C7—C11 | 118.3 (3) | C24—C25—C20 | 118.1 (3) |

**Table S9:** Hydrogen-bond geometry (Å, °)

| <i>D</i> —H··· <i>A</i>     | <i>D</i> —H | H··· <i>A</i> | <i>D</i> ··· <i>A</i> | <i>D</i> —H··· <i>A</i> |
|-----------------------------|-------------|---------------|-----------------------|-------------------------|
| N1—H1A···O1                 | 0.78 (3)    | 2.01(4)       | 2.683(3)              | 144(4)                  |
| C15—H15A···S1               | 0.93        | 2.59          | 3.141(4)              | 118                     |
| C17—H17A···O3 <sup>i</sup>  | 0.93        | 2.46          | 3.308(5)              | 152                     |
| C23—H23A···O4 <sup>i</sup>  | 0.93        | 2.56          | 3.381(5)              | 148                     |
| C25—H25A···O5 <sup>ii</sup> | 0.93        | 2.57          | 3.439(3)              | 156                     |

Symmetry codes: (i) *x*,1+*y*,*z*; (ii) -*x*,1-*y*,1-*z*.
